# Supplementary material for: Translating Ultrasound into Clinical Practice for the Assessment of Swallowing and Laryngeal Function: A Speech and Language Pathology-Led Consensus Study
Source: Springer Nature journal article supplement (doi:10.1007/s00455-022-10413-9), 2022-02-24
Supplement: MOESM1 [file 20165512]

**Supplementary File 1:** Translation of Ultrasound into Clinical Practice for the Assessment of Swallowing and Laryngeal Function - Central Topic Guide

Facilitator: AV

This topic guide has been designed, reviewed, and reformulated by the research team for the project and should be used in conjunction with slides prepared for session.

Duration of NGT meetings: 90 minutes

1. Introduction of group facilitator and acknowledge that group members are all known to one another. Final check that consent paperwork has been completed.
2. Start video recording
3. Outline agenda for meeting:
  - Background and introduction to NGT*
  - Introduction to research question*
  - Idea generation*
  - Discussion*
  - First round of ranking*
  - Finish*
4. Provide background overview to meeting summarising (JA as project lead):
  - The group had identified the need to develop a consensus statement on the translation of ultrasound into SLT practice to support prioritization of future projects & research in this area (inside & outside this group)*
  - Considered different methodologies to do this*
  - Agreed NGT*
  - Split into time zones to realistically achieve this task*
5. Remind group of objectives of the NGT process:
  - Assure different processes for each phase of creativity*
  - Balance participation among members*
  - Incorporate mathematical voting techniques in the aggregation of group judgment*
6. Introduce research question: What is required to translate the use of ultrasound into SLP practice for the purpose of laryngeal and swallowing assessment?  
  
(Items 1-6 = 30 minutes)
7. 10 minutes silent idea generation

8. Invite participants to share ideas in round robin fashion until no further ideas remain. During the process facilitator to ask for clarification, using prompts such as:
  - “Can you explain how x is different to y”
  - “Can you provide an example to make this clearer”
  - “Can you provide further information to explain what this means”(30 minutes)
9. 10 minutes silent rating- facilitator to invite participants to identify top 8 most important ideas from list and consequently rank these from 0-8, (8= most important, 1=least important)
10. Invite participants to share ranking via email with facilitator
11. Close and thank you. Advise group on next steps.

(Items 10-11 = 10 minutes)
